# Supplementary material for: Retinopathy of Prematurity in the Gray Zone of Classification: Etiologic Factors and Long-term Clinical Investigation
Source: Research Square preprint supplement (doi:10.21203/rs.3.rs-7307655/v1), 2025-09-11
Supplement: Supplementary file 1 [file bf163ba69a9869c124ebaf2d.docx]

**Table 2. Comparison of neonatal risk factors and treatment parameters between the groups**

| **Peri-postnatal risk factors** | **Group CV (n=32)**  **mean±SD, (min-max)** | **Group PAR (n=18)**  **mean±SD, (min-max)** | **p value** |
| --- | --- | --- | --- |
| Apgar score at 1 minute  Apgar score at 5 minute  Immediate intubation after delivery, n (%)  Respiratory support at first ROP examination, n (%)  Intubation/SIPPV  Nazal O2 support  Headbox  None  Duration of intubation, day  Nazal CPAP support, day  Headbox O2 support, day  Total duration of respiratory support, day | 5±2 (1-8)  7.1±1.3(4-9)  18 (56.2)  2 (6.2)  10 (31.2)  7 (21.8)  13 (40.6)  8.6±9.9 (2-43)  6±4.9 (1-19)  6.3 ± 5 (1-19)  28.6±20.6 (0-69) | 4.3±1.9 (1-8)  6.3±1.4 (5-9)  15 (83.3)  5 (27.7)  3 (16.6)  3 (16.6)  7 (38.8)  22.2±33.3 (0-99)  9.9±5.9 (1-36)  10±8.3 (2-34)  49.5±47.1(2-150) | 0.30  0.06  0.052  0.187  0.815  0.399  0.142  0.275 |
| Duration of breastfeeding in the NICU, day | 37.4±20.9 (2-36) | 44.1±30.9 (0-42) | 0.372 |
| Duration of antibiotic therapy, day | 23.5±15.7 (0-70) | 37.1±27.8 (10-118) | **0.032** |
| Duration of TPN, day | 37.5±25.9 (9-121) | 29.5±16.5 (7-60) | 0.244 |
| Time to initiation of oral feeding, day | 5.5±3.8 (1-18) | 7.1±5.3 (2-20) | 0.41 |
| Weight gain during hospitalization, gram | 908.5±514.6 (35-2180) | 1078.3±565.5 (220-2600) | 0.302 |
| Duration of hospitalization, day | 65.7±31.1 (17-152) | 79.2±40.6 (16-170) | 0.241 |
|  | **n (%)** | **n (%)** |  |
| Hyperbilirubinemia  Systemic antibiotic treatment  Trombocytopenia  Blood transfusion  Intracranial haemorrhage  Seizure  PDA  Sepsis  Menengitis  Hydrocephalus  RDS  NEC  Bronchopulmonary dysplasia | 26 (81.2)  31 (96.8)  5 (15.6)  15 (46.8)  18 (56.3)  4 (12.5)  11(34.4)  18 (56.2)  0  4 (12.5)  9 (28.1)  2 (6.2)  2 (6.2) | 11(61.1)  18 (100)  6 (33.3)  13 (72.2)  7 (38.9)  3 (16.7)  4 (22.2)  13 (72.2)  2 (11.1)  1 (5.6)  5 (27.8)  2 (11.1)  2 (11.1) | 0.18  0.999  0.172  0.083  0.377  0.692  0.368  0.264  0.125  0.642  0.979  0.612  0.612 |

NICU; neonatal intensive care unit, PDA; patent ductus arteriosus, RDS; respiratory distress syndrome, NEC; necrotizing enterocolits, TPN; total parenteral nutrition.
