# Supplementary material for: Retinopathy of Prematurity in the Gray Zone of Classification: Etiologic Factors and Long-term Clinical Investigation
Source: Research Square preprint supplement (doi:10.21203/rs.3.rs-7307655/v1), 2025-09-11
Supplement: Supplementary file 2 [file c4e60d6227a2efa9c0c167e5.docx]

**Table 3. Comparison of visual acuity, spherical equivalent refractive error, axial length and FA findings between the groups**

|  | **Group CV (n=32)**  **mean**±**SD (min-max)** | **Group PAR (n=18)**  **mean**±**SD (min-max)** | **p value** |
| --- | --- | --- | --- |
| **Visual acuity, logMAR,**  Right eye  Left eye | 0.025±0.04(0.1-0) 0.02±0.03 (0.05-0) | 0.003 ± 0.01(0.05-0)  0.01±0.01 (0.05-0) | 0.873  0.734 |
| **SER, D**  Right eye  Left eye | -0.14±0.6 (-1.12-0.7)  0.02±0.7 (-1.25-1.12) | 0.22±0.94 (-0.37±3.5) 0.18±1.2(-0.5-4.75) | 0.56  0.432 |
| **Axial length, mm**  Right eye  Left eye | 22±1.4(19.4-23.5)  21.8±1.3 (19.8-22) | 21.9±1 (20.6-23.4)  21.9±0.9 (21-23.5) | 0.524  0.98 |
| **FA findings** | **n (%)** | **n (%)** |  |
| Vessel straightening  Abnormal branching  Tangle formation  Arteriovenous shunts  Circumferential vessels  Abnormal capillary beds | 8 (33.3)  22 (91.6)  4 (16.6)  13 (54.1)  9 (37.5)  8 (33.3) | 18 (50)  29 (80.5)  8 (22.2)  11 (30.5)  11 (30.5)  21(58.3) | 0.498  0.628  0.547  0.061  0.534  0.065 |

SER; spherical equivalent refraction, D; dioptre, FA, fluorescein angiography
