# Supplementary material for: Retinopathy of Prematurity in the Gray Zone of Classification: Etiologic Factors and Long-term Clinical Investigation
Source: Research Square preprint supplement (doi:10.21203/rs.3.rs-7307655/v1), 2025-09-11
Supplement: Supplementary file 3 [file fa88af59f71cf852fdffd901.docx]

**Table 1. Basic demographics and ROP characteristics of the groups and comparison of maternal features, neonatal risk factors, and treatment parameters between the groups**

|  | **Group CV, n=32** | **Group PAR, n=18** | **p value** |
| --- | --- | --- | --- |
| Gender, n (%)  Female | 16 (50) | 7 (38.8) | 0.072 |
|  | **Mean ± SD (min-max)** | |  |
| Age, years | 8.7±1.3 (5.5-10.5) | 8.1±1.2 (6.5-10) | 0.025 |
| GA, weeks | 27.9±2 (23.5-32) | 28.4±2.9 (24-34.5) | 0.542 |
| BW, gram | 1065 (560-1765) | 1043.3 (565-2190) | 0.841 |
| Preplus disease/none (%) | 15 (46.8) | 6 (33.3) | 0.352 |
| PMA at first detection of ROP | 33.8 ±1.3 (31-37) | 35.3±2.4 (30-39.5) | **0.025** |
| PMA at the most severe stage of ROP | 35.8 ±1.9 (32-40) | 38.3±3.1 (34-46) | **0.001** |
| PMA at the time of the last ROP examination | 49.9±4.6 (44-55) | 62.7±10.5 (55-90) | **0.001** |
| Presence of popcorn lesion in any examination | 14 (43.8) | 6 (33.3) | 0.470 |
| **Maternal features, prenatal factors** |  |  |  |
| Maternal age, years | 30.1±4.5 (20-40) | 30.2±6.3 (21-40) | 0.978 |
|  | **n (%)** | |  |
| Presence of maternal UTI  Oligo/anhydraminous  Plesenta previa  Premature rupture of membranes  Preeclampsia  Multiple births, twins  Delivery type: VD/CS  Parenteral  consanguinity | 14 (43.7)  10 (31.2)  5 (15.6)  5 (15.6)  11 (34.3)  10 (31.2)  5 (15.6)  4 (12.5) | 8 (44.4)  5 (27.7)  1 (5.5)  2 (11.1)  8 (44.4)  6 (33.3)  1(5.5)  3 (16.7) | 0.869  0.797  0.399  0.98  0.481  0.30  0.398  0.692 |

GA; gestational age, BW; Birth weight, PMA; postmenstruel age, ROP; retinopathy of prematurity, UTI; urinary tract infection, VD/CS; vaginal delivery/caesarean section, SIPPV; synchronized intermittent positive pressure ventilation, CPAP; continuous positive airway pressure, CV**;** completed vascularization, PAR; persistent avascular retina
